# Supplementary material for: Free and Esterified Tocopherols, Tocotrienols and Other Extractable and Non-Extractable Tocochromanol-Related Molecules: Compendium of Knowledge, Future Perspectives and Recommendations for Chromatographic Techniques, Tools, and Approaches Used for Tocochromanol Determination
Source: MDPI journal article supplement (doi:10.3390/molecules27196560), 2022-10-04
Supplement: s1 [file s1]

**Table S1.**  $\alpha$ -T content [ppm] and its relative amount [%] to other detected tocochromanols in the specified sources

| Source                     | Latin name                  | $\alpha$ -T content [ppm] | $\alpha$ -T [%] of total tocochromanols | Other detected tocochromanols                                                               | Ref.  |
|----------------------------|-----------------------------|---------------------------|-----------------------------------------|---------------------------------------------------------------------------------------------|-------|
| Potato tubers (fw)         | <i>Solanum tuberosum</i>    | 0.63                      | 90                                      | $\beta$ -T                                                                                  | [33]  |
| Lettuce leaves (fw)        | <i>Lactuca sativa</i>       | 3.85                      | 55                                      | $\gamma$ -T                                                                                 | [33]  |
| Spinach leaves (fw)        | <i>Spinacia oleracea</i>    | 18.9                      | 63                                      | $\gamma$ -T, $\delta$ -T                                                                    | [33]  |
| Arabidopsis leaves (fw)    | <i>Arabidopsis thaliana</i> | 18.0                      | 90                                      | $\gamma$ -T                                                                                 | [33]  |
| Sunflower seed oil         | <i>Helianthus annuus</i>    | 672.0                     | 96                                      | $\beta$ -T, $\gamma$ -T                                                                     | [33]  |
| Sea buckthorn leaves (dw)* | <i>Hippophaë rhamnoides</i> | 294.6 - 866.3             | 85 - 88                                 | $\beta$ -T, $\gamma$ -T, PC-8                                                               | [30]  |
| Apple leaves (dw)*         | <i>Malus domestica</i>      | 36.3 - 130.2              | 58 - 88                                 | $\beta$ -T, $\gamma$ -T, $\delta$ -T, $\alpha$ -T3, $\beta$ -T3, $\gamma$ -T3, $\delta$ -T3 | [32]  |
| Pear leaves (dw)*          | <i>Pyrus communis</i>       | 53.65 - 72.91             | 76 - 94                                 | $\beta$ -T, $\gamma$ -T, $\delta$ -T, $\alpha$ -T3, $\beta$ -T3, $\gamma$ -T3, $\delta$ -T3 | [32]  |
| Quince leaves (dw)*        | <i>Cydonia oblonga</i>      | 74.71 - 157.73            | 93 - 94                                 | $\beta$ -T, $\gamma$ -T, $\delta$ -T, $\alpha$ -T3, $\beta$ -T3, $\gamma$ -T3, $\delta$ -T3 | [32]  |
| Apricot leaves (dw)*       | <i>Prunus armeniaca</i>     | 191.17 - 225.34           | 81 - 86                                 | $\beta$ -T, $\gamma$ -T, $\delta$ -T, $\alpha$ -T3, $\beta$ -T3, $\gamma$ -T3, $\delta$ -T3 | [32]  |
| Peach leaves (dw)*         | <i>Prunus persica</i>       | 127.2 - 203.34            | 88                                      | $\beta$ -T, $\gamma$ -T, $\delta$ -T, $\alpha$ -T3, $\beta$ -T3, $\gamma$ -T3, $\delta$ -T3 | [32]  |
| Plum leaves (dw)*          | <i>Prunus spinosa</i>       | 127.81 - 180.06           | 94 - 98                                 | $\beta$ -T, $\gamma$ -T, $\delta$ -T, $\alpha$ -T3, $\beta$ -T3, $\gamma$ -T3, $\delta$ -T3 | [32]  |
| Sweet cherry leaves (dw)*  | <i>Prunus avium</i>         | 40.26 - 124.64            | 88 - 90                                 | $\beta$ -T, $\gamma$ -T, $\delta$ -T, $\alpha$ -T3, $\beta$ -T3, $\gamma$ -T3, $\delta$ -T3 | [32]  |
| Safflower seed oil         | <i>Carthamus tinctorius</i> | 552.0                     | 95                                      | $\beta$ -T, $\gamma$ -T, $\delta$ -T, $\alpha$ -T3, $\gamma$ -T3                            | [34]  |
| Wild safflower seed oil    | <i>Carthamus oxyacantha</i> | 546.0                     | 94                                      | $\beta$ -T, $\gamma$ -T, $\delta$ -T, $\alpha$ -T3, $\gamma$ -T3                            | [34]  |
| Almonds seed oil           | <i>Prunus dulcis</i>        | 641.1                     | 100                                     | –                                                                                           | [12]  |
| Guelder rose seed oil      | <i>Viburnum opulus</i>      | 1945.4                    | 71                                      | $\beta$ -T, $\gamma$ -T, $\delta$ -T                                                        | [12]  |
| Sea buckthorn seed oil     | <i>Hippophaë rhamnoides</i> | 1970.2                    | 73                                      | $\beta$ -T, $\gamma$ -T, $\delta$ -T, PC-8                                                  | [12]  |
| Milk thistle seed oil      | <i>Silybum marianum</i>     | 605.9                     | 87                                      | $\beta$ -T, $\gamma$ -T                                                                     | [12]  |
| Wheat germ oil             | <i>Triticum aestivum</i>    | 1917.5                    | 64                                      | $\beta$ -T, $\beta$ -T3, PC-8                                                               | [12]  |
| Sunflower seed oil         | <i>Helianthus annuus</i>    | 684.1                     | 100                                     | –                                                                                           | [12]  |
| Japanese quince seed oil   | <i>Chaenomeles japonica</i> | 1217.9                    | 96                                      | $\beta$ -T, $\gamma$ -T, $\alpha$ -T3                                                       | [35]  |
| Olive oil                  | <i>Olea europaea</i>        | 256.1                     | 97                                      | $\beta$ -T, $\gamma$ -T, $\delta$ -T, $\alpha$ -T3, $\gamma$ -T3                            | [162] |

\* values dependent on variety, season of harvest, sex

**Table S2.**  $\beta$ -T content [ppm] and its relative amount [%] to other detected tocochromanols in the specified sources

| Source                      | Latin Name                        | $\beta$ -T content [ppm] | $\beta$ -T [%] of total tocochromanols | Other detected tocochromanols                                     | Ref.    |
|-----------------------------|-----------------------------------|--------------------------|----------------------------------------|-------------------------------------------------------------------|---------|
| Wheat germ oil              | <i>Triticum aestivum</i>          | 983                      | 31                                     | $\alpha$ -T, $\gamma$ -T, $\delta$ -T, $\alpha$ -T3, $\gamma$ -T3 | [38]    |
| Arabica coffee beans (dw)** | <i>Coffea arabica</i>             | 79.6 - 254.4             | 75                                     | $\alpha$ -T, $\gamma$ -T                                          | [19,39] |
| Robusta coffee beans (dw)** | <i>Coffea canephora</i>           | 21 – 65.4                | 53 - 56                                | $\alpha$ -T, $\gamma$ -T                                          | [19,39] |
| Red oak acorns (dw)         | <i>Quercus rubra</i>              | 223.7                    | 89                                     | $\alpha$ -T, $\gamma$ -T, $\delta$ -T                             | [40]    |
| Red oak acorn seed oil      | <i>Quercus rubra</i>              | 785.3                    | 94                                     | $\alpha$ -T                                                       | [12]    |
| Apple seed oil              | <i>Malus</i> spp.                 | 564.1                    | 54                                     | $\alpha$ -T, $\gamma$ -T, $\delta$ -T                             | [41]    |
| Dessert apple seed oil      | <i>Malus</i> spp.                 | 1242.8                   | 55                                     | $\alpha$ -T, $\gamma$ -T, $\delta$ -T                             | [42]    |
| Guelder rose seed oil       | <i>Viburnum opulus</i>            | 401.4                    | 15                                     | $\alpha$ -T, $\gamma$ -T, $\delta$ -T                             | [12]    |
| Kirkir seed oil             | <i>Vangueria madagascariensis</i> | 657                      | 59                                     | $\alpha$ -T, $\gamma$ -T, $\delta$ -T                             | [44,45] |

\*\*values depending on the degree of roasting and the country of origin

**Table S3.**  $\gamma$ -T content [ppm] and its relative amount [%] to other detected tocochromanols in the specified sources

| Source                  | Latin Name                 | $\gamma$ -T content [ppm] | $\gamma$ -T [%] of total tocochromanols | Other detected tocochromanols                        | Ref.  |
|-------------------------|----------------------------|---------------------------|-----------------------------------------|------------------------------------------------------|-------|
| Flax seed oil           | <i>Linum usitatissimum</i> | 453.9                     | 68                                      | PC-8                                                 | [12]  |
| Golden flax seed oil    | <i>Linum flavum</i>        | 536.1                     | 71                                      | PC-8                                                 | [12]  |
| Chia seed oil           | <i>Salvia hispanica</i>    | 465.3                     | 100                                     | –                                                    | [12]  |
| European beech seed oil | <i>Fagus sylvatica</i>     | 754                       | 68                                      | $\alpha$ -T, $\beta$ -T, $\delta$ -T                 | [47]  |
| Rapeseeds (dw)          | <i>Brassica napus</i>      | 237.3                     | 51                                      | $\alpha$ -T, $\beta$ -T, $\delta$ -T, PC-8           | [139] |
| Pumpkin seed oil        | <i>Cucurbita pepo</i>      | 674.9                     | 100                                     | –                                                    | [12]  |
| Red currant seed oil    | <i>Ribes rubrum</i>        | 1563.9                    | 77                                      | $\alpha$ -T, $\beta$ -T, $\delta$ -T                 | [35]  |
| Pomegranate seed oil    | <i>Punica granatum</i>     | 3826.9                    | 96                                      | $\alpha$ -T, $\delta$ -T, $\alpha$ -T3, $\gamma$ -T3 | [35]  |
| Watermelon seed oil     | <i>Citrullus lanatus</i>   | 1110.1                    | 94                                      | $\alpha$ -T, $\beta$ -T, $\delta$ -T, $\alpha$ -T3   | [35]  |

**Table S4.**  $\delta$ -T content [ppm] and its relative amount [%] to other detected tocochromanols in the specified sources

| Source                            | Latin Name                | $\delta$ -T content [ppm] | $\delta$ -T [%] of total tocochromanols | Other detected tocochromanols        | Ref. |
|-----------------------------------|---------------------------|---------------------------|-----------------------------------------|--------------------------------------|------|
| <i>Borago morisiana</i> (dw)***   | <i>Borago morisiana</i>   | 631.7                     | 88                                      | $\alpha$ -T, $\gamma$ -T             | [46] |
| <i>Borago officinalis</i> (dw)*** | <i>Borago officinalis</i> | 380.1                     | 86                                      | $\gamma$ -T                          | [46] |
| <i>Borago pygmaea</i> (dw)***     | <i>Borago pygmaea</i>     | 857.9                     | 77                                      | $\alpha$ -T, $\beta$ -T, $\gamma$ -T | [46] |
| <i>Borago longifolia</i> (dw)***  | <i>Borago longifolia</i>  | 114.7                     | 71                                      | $\gamma$ -T                          | [46] |
| <i>Borago trabutii</i> (dw)***    | <i>Borago trabutii</i>    | 420.1                     | 82                                      | $\gamma$ -T                          | [46] |
| European beech seed oil           | <i>Fagus sylvatica</i>    | 340.5                     | 31                                      | $\alpha$ -T, $\beta$ -T, $\gamma$ -T | [47] |
| Soybean oil                       | <i>Glycine</i> Willd.     | 332.6                     | 24                                      | $\alpha$ -T, $\beta$ -T, $\gamma$ -T | [12] |
| Guelder rose seed oil             | <i>Viburnum opulus</i>    | 345.9                     | 13                                      | $\alpha$ -T, $\beta$ -T, $\gamma$ -T | [12] |

\*\*\* quantified as  $\alpha$ -T acetate equivalents

**Table S5.**  $\alpha$ -T3 content [ppm] and its relative amount [%] to other detected tocochromanols in the specified sources

| Source         | Latin Name               | $\alpha$ -T3 content [ppm] | $\alpha$ -T3 [%] of total tocochromanols | Other detected tocochromanols                                                              | Ref.  |
|----------------|--------------------------|----------------------------|------------------------------------------|--------------------------------------------------------------------------------------------|-------|
| Oat bran oil   | <i>Avena sativa</i>      | 271                        | 34                                       | $\alpha$ -T, $\beta$ -T, $\gamma$ -T, $\delta$ -T, $\beta$ -T3, $\gamma$ -T3, $\delta$ -T3 | [38]  |
| Rye bran oil   | <i>Secale cereale</i>    | 1604                       | 46                                       | $\alpha$ -T, $\beta$ -T, $\gamma$ -T, $\delta$ -T, $\beta$ -T3, $\gamma$ -T3, $\delta$ -T3 | [38]  |
| Cumin seed oil | <i>Cuminum cyminum</i>   | 699.6                      | 85                                       | $\alpha$ -T, $\delta$ -T, $\beta$ -T3, $\gamma$ -T3, $\delta$ -T3                          | [50]  |
| Palm oil       | <i>Elaeis guineensis</i> | 122                        | 23                                       | $\alpha$ -T, $\beta$ -T, $\gamma$ -T, $\delta$ -T, $\beta$ -T3, $\gamma$ -T3, $\delta$ -T3 | [125] |

**Table S6.**  $\beta$ -T3 content [ppm] and its relative amount [%] to other detected tocochromanols in the specified sources

| Source           | Latin Name               | $\beta$ -T3 content [ppm] | $\beta$ -T3 [%] of total tocochromanols | Other detected tocochromanols                                                               | Ref.  |
|------------------|--------------------------|---------------------------|-----------------------------------------|---------------------------------------------------------------------------------------------|-------|
| Spelt bran oil   | <i>Triticum spelta</i>   | 2086                      | 60                                      | $\alpha$ -T, $\beta$ -T, $\alpha$ -T3, $\gamma$ -T3, $\delta$ -T3                           | [38]  |
| Wheat bran oil   | <i>Triticum aestivum</i> | 1635                      | 49                                      | $\alpha$ -T, $\beta$ -T, $\gamma$ -T, $\delta$ -T, $\alpha$ -T3, $\gamma$ -T3, $\delta$ -T3 | [38]  |
| Nigella seed oil | <i>Nigella sativa</i>    | 1195.1                    | 75                                      | $\alpha$ -T, $\beta$ -T, $\gamma$ -T, $\delta$ -T, $\alpha$ -T3, $\delta$ -T3               | [51]  |
| Rye bran (dw)    | <i>Oryza sativa</i>      | 37                        | 35                                      | $\alpha$ -T, $\beta$ -T, $\gamma$ -T, $\delta$ -T, $\alpha$ -T3                             | [158] |
| Wheat bran (dw)  | <i>Triticum aestivum</i> | 74                        | 58                                      | $\alpha$ -T, $\beta$ -T, $\gamma$ -T, $\delta$ -T, $\alpha$ -T3                             | [158] |
| Spelt bran (dw)  | <i>Triticum spelta</i>   | 109                       | 69                                      | $\alpha$ -T, $\beta$ -T, $\gamma$ -T, $\delta$ -T, $\alpha$ -T3                             | [158] |

**Table S7.**  $\gamma$ -T3 content [ppm] and its relative amount [%] to other detected tocochromanols in the specified sources

| Source                                | Latin Name                   | $\gamma$ -T3 content [ppm] | $\gamma$ -T3 [%] of total tocochromanols | Other detected tocochromanols                                                  | Ref. |
|---------------------------------------|------------------------------|----------------------------|------------------------------------------|--------------------------------------------------------------------------------|------|
| Latex from rubber tree                | <i>Hevea brasiliensis</i>    | 260                        | 83                                       | $\alpha$ -T3, $\delta$ -T3                                                     | [53] |
| Annatto seed oil                      | <i>Bixa orellana</i>         | 20000                      | 12                                       | $\delta$ -T3                                                                   | [54] |
| Grape-seed oil                        | <i>Vitis vinifera</i>        | 1575                       | 72                                       | $\alpha$ -T, $\gamma$ -T, $\delta$ -T, $\alpha$ -T3, $\beta$ -T3, $\delta$ -T3 | [57] |
| <i>Washingtonia filifera</i> seed oil | <i>Washingtonia filifera</i> | 963.3                      | 72                                       | $\alpha$ -T, $\beta$ -T, $\gamma$ -T, $\delta$ -T, $\alpha$ -T3, $\delta$ -T3  | [55] |
| Cranberry seed oil                    | <i>Vaccinium macrocarpon</i> | 1800                       | 92                                       | $\gamma$ -T, $\alpha$ -T3, $\delta$ -T3                                        | [56] |
| Arctic cranberry seed oil             | <i>Vaccinium oxycoccos</i>   | 1900                       | 95                                       | $\gamma$ -T, $\alpha$ -T3                                                      | [56] |
| Lingonberry seed oil                  | <i>Vaccinium vitis-idaea</i> | 1200                       | 85                                       | $\alpha$ -T3                                                                   | [56] |
| Coriander seed oil                    | <i>Coriandrum sativum</i>    | 302.6                      | 75                                       | $\alpha$ -T, $\gamma$ -T, $\delta$ -T, $\alpha$ -T3, $\delta$ -T3              | [50] |
| Parsley seed oil                      | <i>Petroselinum sativum</i>  | 175.2                      | 75                                       | $\gamma$ -T, $\alpha$ -T3, $\delta$ -T3                                        | [50] |
| Celery seed oil                       | <i>Apium graveolens</i>      | 608.9                      | 83                                       | $\alpha$ -T, $\alpha$ -T3, $\delta$ -T3                                        | [50] |
| Dill seed oil                         | <i>Anethum graveolens</i>    | 668.5                      | 76                                       | $\alpha$ -T, $\delta$ -T, $\alpha$ -T3, $\beta$ -T3, $\delta$ -T3              | [50] |
| Carrot seed oil                       | <i>Daucus carota</i>         | 228.2                      | 57                                       | $\alpha$ -T, $\alpha$ -T3, $\beta$ -T3, $\delta$ -T3                           | [50] |
| Caraway seed oil                      | <i>Carum carvi</i>           | 1183.9                     | 76                                       | $\gamma$ -T, $\delta$ -T, $\alpha$ -T3, $\delta$ -T3                           | [50] |
| Fennel seed oil                       | <i>Foeniculum vulgare</i>    | 393.2                      | 56                                       | $\beta$ -T, $\gamma$ -T, $\alpha$ -T3, $\beta$ -T3, $\delta$ -T3               | [50] |

**Table S8.**  $\delta$ -T3 content [ppm] and its relative amount [%] to other detected tocochromanols in the specified sources

| Source                 | Latin Name                      | $\delta$ -T3 content [ppm] | $\delta$ -T3 [%] of total tocochromanols | Other detected tocochromanols                                                 | Ref. |
|------------------------|---------------------------------|----------------------------|------------------------------------------|-------------------------------------------------------------------------------|------|
| Annatto seed oil       | <i>Bixa orellana</i>            | 149000                     | 88                                       | $\gamma$ -T3                                                                  | [54] |
| Latex from rubber tree | <i>Hevea brasiliensis</i>       | 52                         | 17                                       | $\alpha$ -T3, $\gamma$ -T3                                                    | [53] |
| Giant hogweed seed oil | <i>Heracleum mantegazzianum</i> | 360.1                      | 32                                       | $\alpha$ -T3, $\beta$ -T3, $\delta$ -T3                                       | [50] |
| Lychee seed oil        | <i>Litchi chinensis</i>         | 7675                       | 82                                       | $\alpha$ -T, $\beta$ -T, $\gamma$ -T, $\delta$ -T, $\alpha$ -T3, $\gamma$ -T3 | [63] |

**Table S9.** PC-8 content [ppm] and its relative amount [%] to other detected tocochromanols in the specified sources

| Source                                         | Latin Name                         | PC-8 content [ppm] | PC-8 [%] of total tocochromanols | Other detected tocochromanols                                   | Ref.  |
|------------------------------------------------|------------------------------------|--------------------|----------------------------------|-----------------------------------------------------------------|-------|
| <i>Cecropia</i> sp. leaves (dw)                | <i>Cecropia</i> sp.                | 1783               | 51                               | unpublished                                                     | [65]  |
| <i>Pseudobombax munguba</i> leaves (dw)        | <i>Pseudobombax munguba</i>        | 3640               | 64                               | unpublished                                                     | [65]  |
| <i>Tabaernamontana siphilitica</i> leaves (dw) | <i>Tabaernamontana siphilitica</i> | 276                | 44                               | unpublished                                                     | [65]  |
| <i>Apeiba</i> sp. leaves (dw)                  | <i>Apeiba</i> sp.                  | 617                | 46                               | unpublished                                                     | [65]  |
| <i>Corchorus olitorius</i> seed oil            | <i>Corchorus olitorius</i>         | 109                | 6                                | $\alpha$ -T, $\beta$ -T, $\gamma$ -T, $\delta$ -T               | [63]  |
| <i>Erythrophleum fordii</i> seed oil           | <i>Erythrophleum fordii</i>        | 167                | 16                               | $\alpha$ -T, $\beta$ -T, $\gamma$ -T, $\delta$ -T, $\alpha$ -T3 | [63]  |
| <i>Connarus paniculatus</i> seed oil           | <i>Connarus paniculatus</i>        | 76                 | 14                               | $\alpha$ -T, $\beta$ -T, $\gamma$ -T                            | [63]  |
| Rapeseeds (dw)                                 | <i>Brassica napus</i>              | 67.2               | 12                               | $\alpha$ -T, $\beta$ -T, $\gamma$ -T, $\delta$ -T               | [138] |
| Flaxseed oil                                   | <i>Linum usitatissimum</i>         | 216                | 23                               | $\alpha$ -T, $\gamma$ -T, $\delta$ -T                           | [12]  |

**Table S10.** Summary of applied NPLC methods for the determination of tocochromanol related compounds

| Column                                        | Mobile phase                     | Temperature, Flow rate, Gradient or isocratic, Run time   | Analytes                                           | Matrix                                     | Detector   | Ref. |
|-----------------------------------------------|----------------------------------|-----------------------------------------------------------|----------------------------------------------------|--------------------------------------------|------------|------|
| Kromasil Phenomenex (250 x 4.6mm; 5 µm)       | hx:EtOAc:AcOH (97.3:1.8:0.9)     | —; 1.6mL/min; Isocratic; 25 min                           | 4Ts, 4T3s                                          | Cereals                                    | FLD        | [11] |
| LiChrosorb Si60 (250 x 4.6 mm; 5 µm)          | hx:dioxane (96:4)                | 20 °C; 1mL/min; Isocratic; 40 min                         | 4Ts, 4T3s, PC-8                                    | Flaxseed oil                               | FLD        | [13] |
| Lichrosphere Si-60 Merck (250 x 4.0 mm; 5 µm) | hx:IPA (99:1)                    | —; 1mL/min; Isocratic; 15 min                             | αT, βT, γT                                         | Coffee oil                                 | FLD        | [18] |
| LiChrosorb Si 60 (250 x 4.6 mm; 5 µm)         | hx:dioxane (97:3)                | —; 1.5mL/min; Isocratic; —                                | 4Ts                                                | Coffee beans                               | FLD        | [19] |
| Alltima SI column (250 x 4.6 mm; 5 µm)        | hx:EtOAc:AcOH (97.3:1.8:0.9)     | 20 °C; 1.6mL/min; Isocratic; —                            | 4Ts                                                | Lupinus mutabilis sweet seeds              | FLD        | [21] |
| Supelcosil LC-Si (250 x 4.6 mm; 5 µm)         | EtOAc:AcOH:hx (or hp) (1:1 :198) | —; 1.5mL/min; Isocratic; (if hex: 18 min; if hep: 21 min) | 4Ts, 4T3s                                          | Wheat, oat, rye dough and bread            | FLD        | [22] |
| Silica (300 mm × 3.9 mm; 5 µm)                | hx:IPA (99.8:0.2)                | —; 1.3mL/min; Isocratic; —                                | α-T, γ-T3, δ-T, δ-T3, desmethyl-T3, didesmethyl-T3 | Extracts of stabilized rice bran           | FLD        | [26] |
| Hypersil silica column (200 x 4.6 mm; µm)     | hx:dioxane (96:4)                | 40 °C; 1mL/min; Isocratic; 20 min                         | 4Ts, 4T3s, α-TAc                                   | STD, crude palm oil                        | UV         | [29] |
| LiChrosorb Si 60 (250 x 4.6 mm; 5µm)          | hx:dioxane (97:3)                | 20 °C; 1.5mL/min; Isocratic; 20 min                       | αT, βT, γT, PC-8                                   | Leaves of Sea Buckthorn (H. rhamnoides L.) | FLD        | [30] |
| SupelcosilTM LC-SI (75 x 3.0 mm; 3 µm)        | hx:dioxane (98:2)                | 21 °C; 0.7mL/min; Isocratic; 8 min                        | 4Ts, tocol (IS)                                    | Coffee beans                               | DAD<br>FLD | [39] |
| Diol (250 x 4.6 mm; µm)                       | hp:MTBE (99:1)                   | —; 1.3mL/min; Isocratic; —                                | 4Ts, 4T3s                                          | Sunflower oil                              | FLD        | [51] |
| Phenomenex Luna Silica (250 x 4.6 mm; 5 µm)   | hp:EtOAc (93:7)                  | 30 °C; 0.6mL/min; Isocratic; —                            | 4T3s, αT, 11'-αT1, 7,11'-αT2                       | T3 rich fraction                           | FLD        | [52] |
| Particil Pac (250 x 4.6 mm; 5 µm)             | hx:THF (94:6)                    | —; 1mL/min; Isocratic; —                                  | 4Ts, 4T3s                                          | Grape seeds                                | FLD<br>DAD | [60] |
| Diol (250 x 4.6 mm)                           | hp:MTBE (99:1)                   | —; 1.3mL/min; Isocratic; —                                | 4Ts, 4T3s, PC-8                                    | Different oils                             | FLD        | [63] |

| Column                                                                           | Mobile phase                    | Temperature, Flow rate, Gradient or isocratic, Run time | Analytes                                            | Matrix                                                                 | Detector            | Ref.  |
|----------------------------------------------------------------------------------|---------------------------------|---------------------------------------------------------|-----------------------------------------------------|------------------------------------------------------------------------|---------------------|-------|
| Zorbax SIL<br>(250 x 4.6 mm; 5 µm)                                               | hx:dioxane:IPA<br>(985:10:5)    | 30 °C; 1.5mL/min; Isocratic; —                          | 4Ts, 4T3s, αT1                                      | Palm, rice bran oil                                                    | FLD                 | [69]  |
| Extrasil Si<br>(250 x 4.6 mm; 3 µm)                                              | hx:MTBE<br>(97:3)               | —; 1.5mL/min; Isocratic; —                              | γT1, βT1                                            | Leaves of<br>Kalanchoe<br>daigremontiana<br>and Phaseolus<br>coccineus | FLD<br>APPI-MS      | [74]  |
| Nucleodur 100 Si<br>(250 x 4 mm; 5 µm)                                           | hx:IPA<br>(98.8:1.2)            | —; 1mL/min; Isocratic; —                                | α-tocopherol quinone, αT                            | Vegetable Oils                                                         | DAD                 | [88]  |
| Reposil 100 C18<br>(250 x 4 mm; 5 µm)<br>Nucleosil 125C 18<br>(125 x 4 mm; 5 µm) | MeOH:IPA<br>(65:35)             | —; 1mL/min; Isocratic; —                                | α-tocopherol esters (oleic,<br>palmitic, linolenic) |                                                                        |                     |       |
| LiChrosorb Si 60 Hibar RT<br>(250 x 4 mm; 5 µm)                                  | hx:IPA<br>(99.15:0.85)          | —; 1mL/min; Isocratic; —                                | 4Ts, 4T3s                                           | Distillates of<br>structured lipids                                    | FLD                 | [89]  |
| Inertsil silica<br>(250 x 4.6 mm; µm)                                            | hx:dioxane<br>(97:3)            | 30 °C; 2mL/min; Isocratic; 20 min                       | 4Ts, 4T3s                                           | Cereals                                                                | FLD                 | [102] |
| Kromasil Phenomenex Si<br>(250 x 4.6 mm; 5 µm)                                   | hx:EtOAc:AcOH<br>(97.3:1.8:0.9) | —; 1.6mL/min; Isocratic; 25 min                         | 4Ts, 4T3s                                           | Cereals                                                                | FLD                 | [108] |
| LiChrospher Si60<br>(250 x 4 mm; 5 µm)                                           | hx:dioxane<br>(96:4)            | —; 2mL/min; Isocratic; —                                | αT, γT                                              | Roasted pumpkin<br>seeds                                               | FLD                 | [121] |
| LiChrosorb Si 60<br>(250 x 4.6 mm; 5 µm)                                         | hx:dioxane<br>(96:4)            | —; 1mL/min; Isocratic; —                                | 4Ts, PC-8                                           | Rapeseed oil                                                           | FLD                 | [122] |
| Luna NH2 100<br>(250 x 4.6 mm; 5 µm)                                             | hx:IPA<br>(96:4)                | —; 2mL/min; Isocratic; —                                | 4Ts                                                 | Canola seed oil                                                        | FLD                 | [123] |
| ProntoSil 120-5 Diol<br>(250 x 4.0 mm; 5 µm)                                     | A: hx<br>B: dioxane<br>C: MTBE  | —; 1mL/min; Gradient; 60 min                            | 4Ts, 4T3s, and oxidation<br>products                | STD                                                                    | DAD<br>FLD<br>EI-MS | [132] |
| Alltima SI 5U (Alltech)<br>(250 x 4.6 mm; 5 µm)                                  | hx:dioxane<br>(96:4)            | —; 2mL/min; Isocratic; 15 min                           | 4Ts, 4T3s                                           | STD                                                                    | FLD                 | [134] |
| Inertsil SI<br>(250 x 4.6 mm; 5 µm)                                              | hx:dioxane<br>(95:5)            | —; 2mL/min; Isocratic; 15 min                           |                                                     |                                                                        |                     |       |

| Column                                              | Mobile phase                      | Temperature, Flow rate, Gradient or isocratic, Run time | Analytes                                                                  | Matrix                                                                                                 | Detector           | Ref.  |
|-----------------------------------------------------|-----------------------------------|---------------------------------------------------------|---------------------------------------------------------------------------|--------------------------------------------------------------------------------------------------------|--------------------|-------|
| Genesis silica<br>(250 x 4.6 mm; 4 µm)              | hx:dioxane<br>(96:4)              | —; 1.5mL/min; Isocratic; 22 min                         | 4Ts, 4T3s                                                                 | STD                                                                                                    | FLD                | [134] |
| LiChrosorb Diol Hibar<br>(250 x 4 mm; 5 µm)         | hx:MTBE<br>(96:4)                 | —; 2mL/min; Isocratic; 30 min                           |                                                                           |                                                                                                        |                    |       |
| Hypersil APS-2<br>(250 x 4.6 mm; 5 µm)              | hx:dioxane<br>(95:5)              | —; 2.5mL/min; Isocratic; 16 min                         |                                                                           |                                                                                                        |                    |       |
| LiChrosorb NH2<br>(250 x 4 mm; 5 µm)                | hx:MTBE:THF:MeOH<br>(79:20:1:0.1) | —; 1mL/min; Isocratic; 18 min                           |                                                                           |                                                                                                        |                    |       |
| Waters p-Bondapak NH2<br>(300 x 3.9 mm; 10 µm)      | cyclohexane:MTBE<br>(90:10)       | —; 1mL/min; Isocratic; 20 min                           | $\alpha$ T, 5,7-dimethyltolcol<br>(IS), $\beta$ T, $\gamma$ T, $\delta$ T | STD                                                                                                    | FLD                | [135] |
| Alltech Lichrosorb DIOL<br>(250 x 4.6 mm; 10 µm)    | hx:MTBE<br>(90:10)                | —; 1mL/min; Isocratic; 32 min                           |                                                                           |                                                                                                        |                    |       |
| ES Industries Chromega Diol<br>(250 x 4.6 mm; 5 µm) | hx:diisopropyl ether<br>(90:10)   | —; 1mL/min; Isocratic; 32 min                           |                                                                           |                                                                                                        |                    |       |
| LiChrospher 100 diol<br>(250 x 4 mm; 5 µm)          | A:hx<br>B:MTBE                    | —; 1.3mL/min; Gradient; 72 min                          | $\alpha$ TAc, 4Ts, 4T3s, PC-8                                             | Infant formulas,<br>human milk,<br>breakfast cereals,<br>multivitamin<br>juices, isotonic<br>beverages | FLD                | [136] |
| Diol<br>(250 x 4.6 mm)                              | hp:MTBE<br>(99:1)                 | —; 1.3mL/min; Isocratic; —                              | 4Ts, 4T3s, PC-8                                                           | Citrus seed oil                                                                                        | FLD                | [138] |
| LiChrosorb Si 60<br>(250 x 4.6 mm; 5 µm)            | hx:dioxane<br>(97:3)              | —; 1.5mL/min; Isocratic; —                              | 4Ts, PC-8                                                                 | Rapeseed oil                                                                                           | FLD                | [139] |
| Zorbax SIL<br>(250 x 4.6 mm)                        | hx:IPA<br>(99:1)                  | room temperature;<br>2mL/min; Isocratic; 6 min          | 4Ts, $\alpha$ T3, $\gamma$ T3, $\delta$ T3                                | STD                                                                                                    | UV-VIS             | [145] |
| Inertsil 5 SI<br>(250 x 3 mm; µm)                   | dioxane:hx<br>(3.5:96.5)          | room temperature °C;<br>0.7mL/min; Isocratic; 25 min    | 4Ts and 4T3s                                                              | Olive oil                                                                                              | DAD<br>FLD<br>ELSD | [162] |



| Column                                                   | Mobile phase                 | Temperature, Flow rate, Gradient or isocratic, Run time | Analytes                                                 | Matrix                        | Detector   | Ref.  |
|----------------------------------------------------------|------------------------------|---------------------------------------------------------|----------------------------------------------------------|-------------------------------|------------|-------|
| Varian A2014250X020 propyl-amine (250 x 2 mm; 3 $\mu$ m) | (A) hx<br>(B) hx:dioxane 1:1 | —; 0.3-0.5mL/min; Gradient; 15 min                      | 4Ts, 4T3s, $\alpha$ -tocopherylquinone, 2H6-R-tocopherol | Human plasma                  | APCI(+)-QQ | [192] |
| Phenomenex Luna Silica (250 x 4.6 mm; 5 $\mu$ m)         | hp:THF (1000:40)             | —; 1mL/min; Isocratic; 30 min                           | 4Ts, 4T3s, 11'- $\alpha$ T1, 11'- $\gamma$ T1            | Pumpkin seeds                 | FLD        | [193] |
| Zorbax Polaris Silica (150 x 4.6 mm; 3 $\mu$ m)          | (A) hp<br>(B) EtOAc          | 40 °C; 2mL/min; Gradient; 15 min                        | 4Ts, 4T3s, 11'- $\alpha$ T1                              | Palm-derived T3 rich fraction | PDA        | [194] |

**Table S11.** Summary of applied RPLC methods for the determination of tocochromanol related compounds

| Column                                    | Mobile phase (v/v)                                                | Temperature, Flow rate, Gradient or isocratic, Run time | Analytes                                                                                               | Matrix                      | Detector             | Ref. |
|-------------------------------------------|-------------------------------------------------------------------|---------------------------------------------------------|--------------------------------------------------------------------------------------------------------|-----------------------------|----------------------|------|
| Kinetex PFP (100 x 4.6 mm; 2.6 $\mu$ m)   | MeOH:H <sub>2</sub> O (76:24)                                     | 40 °C; 1.2 mL/min; Isocratic; 90 min                    | 4Ts, 4T3s, $\alpha$ T1                                                                                 | Cyanobacteria, microalgae   | FLD                  | [15] |
|                                           | A:MeOH:H <sub>2</sub> O (80:20)<br>B:MeOH:H <sub>2</sub> O (97:3) | 40 °C; 0.6 mL/min; Gradient; 16 min                     |                                                                                                        |                             | DAD<br>APCI-Orbitrap |      |
| Nucleosil 100 C18 (250 x 4 mm; 5 $\mu$ m) | ACN:MeOH:H <sub>2</sub> O (72:8:1)                                | —; 1.5 mL/min; Isocratic; —                             | $\alpha$ T, $\gamma$ T, $\delta$ T                                                                     | Young leaves of runner bean | FLD                  | [31] |
| YMC C30 (250 x 4.6 mm; 3 $\mu$ m)         | MeOH (25 mM sodium chlorate, 2 mM HClO <sub>4</sub> )             | —; 1.5 mL/min; Isocratic; 11.8 min                      | nitro- $\gamma$ T                                                                                      |                             | ECD                  |      |
| Nucleosil 100 C18 (250 x 4 mm; 5 $\mu$ m) | MeOH:hx (85:15)                                                   | 24 °C; 1.5 mL/min; Isocratic; 10 min                    | PC-8                                                                                                   | Plant Oils                  | FLD                  | [36] |
|                                           | ACN:MeOH:H <sub>2</sub> O (72:8:1)                                | 24 °C; 2 mL/min; Isocratic; 12 min                      | $\alpha$ T, ( $\beta$ T+ $\gamma$ T), $\delta$ T, $\alpha$ T3, ( $\beta$ T3+ $\gamma$ T3), $\delta$ T3 |                             |                      |      |
| YMC C30 (250 x 4.6 mm; 3 $\mu$ m)         | ACN:MeOH:H <sub>2</sub> O (72:8:1)                                | 24 °C; 1 mL/min; Isocratic; —                           | $\beta$ T3, $\gamma$ T3                                                                                | Plant oils                  | FLD                  | [36] |
| Nucleosil 100 C18 (250 x 4 mm; 5 $\mu$ m) | ACN:MeOH:H <sub>2</sub> O (72:8:1)                                | —; 1.5 mL/min; Isocratic; 25 min                        | $\alpha$ T, ( $\beta$ T+ $\gamma$ T), $\delta$ T, $\alpha$ T3, ( $\beta$ T3+ $\gamma$ T3), $\delta$ T3 | Oils                        | FLD                  | [37] |
|                                           | MeOH:hx (340:20)                                                  | —; 1.5 mL/min; Isocratic; 25 min                        | PC-8                                                                                                   |                             |                      |      |

| Column                                                  | Mobile phase ( <i>v/v</i> )                                               | Temperature, Flow rate, Gradient or isocratic, Run time | Analytes                                                                                                                 | Matrix                                                                 | Detector       | Ref.  |
|---------------------------------------------------------|---------------------------------------------------------------------------|---------------------------------------------------------|--------------------------------------------------------------------------------------------------------------------------|------------------------------------------------------------------------|----------------|-------|
| YMC C30<br>(150 x 3.0 mm; 3 $\mu$ m)                    | A: MeOH:H <sub>2</sub> O (96:4)<br>B: MeOH:MTBE:H <sub>2</sub> O (4:92:4) | 25 °C; 0.42 mL/min; Gradient; —                         | 4Ts                                                                                                                      | Seed oils                                                              | DAD            | [41]  |
| Luna PFP<br>(150 x 4.6 mm; 3 $\mu$ m)                   | MeOH:H <sub>2</sub> O<br>(93:7)                                           | 40 °C; 1 mL/min; Isocratic; 13 min                      | 4Ts                                                                                                                      | Seed oils                                                              | FLD            | [42]  |
| C30 phase<br>(250 x 4.6 mm; 5 $\mu$ m)                  | ACN:MeOH:dichlormethane<br>(72:22:6)                                      | 30 °C; 1 mL/min; Isocratic; —                           | 4Ts                                                                                                                      | Viburnum opulus<br>pomace and<br>berries                               | FLD            | [43]  |
| Brownlee C18<br>(100 x 4.6 mm; 5 $\mu$ m)               | MeOH:ACN:H <sub>2</sub> O<br>(50:44:6)                                    | —; 1 mL/min; Isocratic; —                               | $\alpha$ T, ( $\beta$ T+ $\gamma$ T), $\delta$ T, $\alpha$ T3,<br>( $\beta$ T3+ $\gamma$ T3), $\delta$ T3                | Berries seed oils                                                      | DAD            | [56]  |
| Nucleosil 100<br>(250 x 4 mm; 5 $\mu$ m)                | MeOH:hx<br>(340:20)                                                       | —; 1.5 mL/min; Isocratic; 15 min                        | $\gamma$ T, $\alpha$ T, plastoquinol-9,<br>PC-8                                                                          | Leaves of<br>Arabidopsis                                               | DAD<br>FLD     | [68]  |
| Intersil ODS-2<br>(250 x 4.6 mm; 5 $\mu$ m)             | MeOH:H <sub>2</sub> O<br>(95:5)                                           | 30 °C; 1 mL/min; Isocratic; 35 min                      | $\alpha$ T, ( $\beta$ T + $\gamma$ T), $\delta$ T, $\alpha$ T3,<br>( $\beta$ T3 + $\gamma$ T3), $\delta$ T3, $\alpha$ T1 | Palm, rice bran<br>oil                                                 | FLD            | [69]  |
| Supelcosil LC18<br>(250 x 4.6 mm; 5 $\mu$ m)            | 50 mM sodium perchlorate in<br>MeOH                                       | —; 1 mL/min; Isocratic; 15 min                          | MDT, $\alpha$ -T                                                                                                         | Eggs of the<br>Pacific Salmon                                          | ED             | [70]  |
| 2 x Supelcosil LC18<br>(250 x 4.6 mm; 5 $\mu$ m)        | 50 mM sodium perchlorate in<br>MeOH:H <sub>2</sub> O<br>(50:1)            | —; 1 mL/min; Isocratic; 50 min                          | MDT, $\alpha$ T                                                                                                          | Marine<br>organisms                                                    | ECD            | [71]  |
| Develosil RP C30<br>(250 x 4.6 mm)                      | MeOH                                                                      | —; 1 mL/min; isocratic; —                               | 4Ts, 4T3s, $\alpha$ T1                                                                                                   | Palm oil                                                               | FLD            | [72]  |
| Nucleosil 100 C18<br>(250 x 4 mm; 5 $\mu$ m)            | ACN:MeOH:H <sub>2</sub> O<br>(72:8:1)                                     | —; 1.5 mL/min; Isocratic; —                             | $\delta$ T1, ( $\gamma$ T1+ $\beta$ T1), $\delta$ T, $\gamma$ T, $\alpha$ T                                              | Leaves of<br>Kalanchoe<br>daigremontiana<br>and Phaseolus<br>coccineus | FLD<br>APPI-MS | [74]  |
| Kinetex PFP<br>(150 x 3.0 mm; 2.6 $\mu$ m)              | A:MeOH:H <sub>2</sub> O (85:15)<br>B:MTBE:MeOH:H <sub>2</sub> O (80:18:2) | 24 °C; 0.3 mL/min; Gradient; 45 min                     | 4Ts, 4T3s                                                                                                                | Cooked and raw<br>vegetables                                           | FLD            | [101] |
| Develosil RP Aqueous (C30)<br>(150 x 3.0 mm; 3 $\mu$ m) | A:MeOH:H <sub>2</sub> O (91:9)<br>B:MTBE:MeOH:H <sub>2</sub> O (80:18:2)  | 18 °C; 0.5 mL/min; Gradient; 63 min                     |                                                                                                                          |                                                                        |                |       |

| Column                                                | Mobile phase ( <i>v/v</i> )                    | Temperature, Flow rate, Gradient or isocratic, Run time | Analytes                                                                                                  | Matrix                                                        | Detector  | Ref.  |
|-------------------------------------------------------|------------------------------------------------|---------------------------------------------------------|-----------------------------------------------------------------------------------------------------------|---------------------------------------------------------------|-----------|-------|
| DOCOSIL-B C22<br>(250 x 4.6 mm; 2.6 $\mu$ m)          | MeOH                                           | —; 1 mL/min; Isocratic; 45 min                          | $\delta$ T, $\gamma$ T, $\alpha$ T, MDT, 11'- $\alpha$ -T1                                                | Tuna oil deodorization Scum                                   | FLD       | [130] |
| Develosil RPC30<br>(250 x 4.6 mm; 5 $\mu$ m)          | MeOH:H <sub>2</sub> O<br>(99:1)                | 10 °C; 1 mL/min; Isocratic; 37 min                      | 4Ts, tocol (IS)                                                                                           | Oils                                                          | FLD       | [141] |
| YMC C30<br>(250 x 4.6 mm; 5 $\mu$ m)                  | MeOH:H <sub>2</sub> O<br>(95:5)                | 5 °C; 1 mL/min; Isocratic; 30 min                       |                                                                                                           |                                                               |           |       |
| Cosmosil $\pi$ -NAP<br>(250 x 4.6 mm; 5 $\mu$ m)      | MeOH:H <sub>2</sub> O<br>(90:10)               | 30 °C; 1.5 mL/min; Isocratic; 15 min                    |                                                                                                           |                                                               | DAD + FLD | [141] |
| Phenomenex Kinetex PFP<br>(150 x 4.6 mm; 2.6 $\mu$ m) | A: MeOH:H <sub>2</sub> O<br>B: MeOH<br>(80:20) | 40 °C; 0.8 mL/min; Gradient; 60 min                     | 4Ts, 4T3s, $\alpha$ -T1                                                                                   | Palm fruits                                                   | FLD       | [142] |
| Nucleosil 100 C18<br>(250 x 4 mm; 5 $\mu$ m)          | A: MeOH<br>B: MeOH:IPA:ACN<br>(40:50:10)       | 25 °C; 1-1.2 mL/min; Gradient; 26 min                   | $\alpha$ T, ( $\beta$ T+ $\gamma$ T), $\delta$ T, $\alpha$ T3,<br>( $\beta$ T3+ $\gamma$ T3), $\delta$ T3 | Cereals                                                       | FLD       | [146] |
| PerfectSil Target ODS-3<br>(250 x 4.6 mm; 3 $\mu$ m)  | A: IPA<br>B: H <sub>2</sub> O                  | 7 °C; 0.24-0.31 mL/min; Gradient;<br>62 min             | 4Ts, 4T3s                                                                                                 | Cereals                                                       | FLD       | [147] |
| COSMOSIL $\pi$ -NAP<br>(250 x 4.6 mm; 5 $\mu$ m)      | MeOH:H <sub>2</sub> O<br>(90:10)               | —; 1 mL/min; Isocratic; 20 min                          | 4Ts                                                                                                       | Edible oils                                                   | DAD       | [148] |
| Cosmosil 5PYE<br>(250 x 4.6 mm; $\mu$ m)              | MeOH:H <sub>2</sub> O<br>(95:5)                | 30 °C; 1 mL/min; Isocratic; —                           | $\alpha$ T, $\beta$ T, $\gamma$ T                                                                         | Hazelnuts                                                     | DAD       | [149] |
| Quasar SPP RP-Amide<br>(150 x 4.6 mm; 2.6 $\mu$ m)    | MeOH:H <sub>2</sub> O (1% FA)<br>(9:91)        | 40 °C; 1 mL/min; Isocratic; 30 min                      | 4Ts, 4T3s                                                                                                 | STD                                                           | FLD       | [150] |
| Taxsil PFP<br>(250 x 4.6 mm; 5 $\mu$ m)               | MeOH:H <sub>2</sub> O<br>(92:8)                | —; 1 mL/min; Isocratic; 20 min                          | 4Ts                                                                                                       | STD, soybean oil and deodorizer distillate, vitamin E capsule | DAD       | [151] |
| Acquity BEH C18<br>(50 x 2.1 mm; 1.7 $\mu$ m)         | A: MeOH:H <sub>2</sub> O (90:10)<br>B: MeOH    | 60 °C; 0.8 mL/min; Gradient; —                          | $\alpha$ T, phylloquinone, PC-8, plastoquinone-9                                                          | Plant tissues                                                 | APCI-QTOF | [153] |
| Eclipse XDB C18<br>(150 x 4.6 mm; 5 $\mu$ m)          | ACN:MeOH:IPA<br>(40:55:5)                      | 30 °C; 0.8 mL/min; Isocratic; 13 min                    | $\alpha$ T, ( $\beta$ T+ $\gamma$ T), $\delta$ T, $\alpha$ T3,<br>( $\beta$ T3+ $\gamma$ T3), $\delta$ T3 | Barley                                                        | FLD       | [154] |

| Column                                                  | Mobile phase (v/v)                                                           | Temperature, Flow rate, Gradient or isocratic, Run time | Analytes                                                                  | Matrix                                      | Detector          | Ref.  |
|---------------------------------------------------------|------------------------------------------------------------------------------|---------------------------------------------------------|---------------------------------------------------------------------------|---------------------------------------------|-------------------|-------|
| HyPurity C18<br>(250 x 4.6 mm; 5 $\mu$ m)               | THF:MeOH<br>(10:90)                                                          | 21 °C; 1 mL/min; Isocratic; 10 min                      | $\alpha$ T, ( $\beta$ T+ $\gamma$ T), $\delta$ T                          | Olive oil                                   | DAD<br>FLD        | [159] |
| Altech C18<br>(250 x 4 mm; 5 $\mu$ m)                   | MeOH:1,4 dioxane:H <sub>2</sub> O +75 mM NaClO <sub>4</sub><br>(86:10:4)     | —; 1 mL/min; Isocratic; —                               | 4Ts, 4T3s                                                                 | Cereals                                     | ECD               | [160] |
| Superspher 100 RP18<br>(250 x 4 mm; 4 $\mu$ m)          | EtOH:MeOH (2.5 mM HClO <sub>4</sub> , 7.5 mM NaClO <sub>4</sub> )<br>(90:10) | 12.5 °C; 0.6 mL/min; Isocratic; —                       | 4Ts                                                                       | Human plasma                                | ECD               | [161] |
| LiChrosorb RP18<br>(120 x 4.6 mm; 5 $\mu$ m)            | MeOH-H <sub>2</sub> O<br>(98:2)                                              | —; 1.5 mL/min; Isocratic; 8 min                         | $\alpha$ T, $\gamma$ T, $\delta$ T, $\alpha$ T-Ac                         | Cultured endothelial cells, human platelets | UV<br>FLD<br>ELSD | [164] |
| Waters RP8<br>(150 x 2.1 mm; 3.5 $\mu$ m)               | A:H <sub>2</sub> O(0.1% FA)<br>B:ACN (0.1 % FA)                              | room temperature;<br>0.3 mL/min; Gradient; —            | $\alpha$ T, $\alpha$ T quinone                                            | Human plasma                                | ESI-MS/MS         | [165] |
| XTerra MS C18<br>(100 x 2.1 mm; 3.5 $\mu$ m)            | 6 mM ammonia in MeOH:H <sub>2</sub> O<br>(97:3)                              | 25 °C; 0.2 mL/min; Isocratic; —                         | $\alpha$ T, $\gamma$ T, $\delta$ T, $\alpha$ T3, $\gamma$ T3, $\delta$ T3 | Cereals                                     | LC-ESI-TOF        | [187] |
| In-house prepared C30<br>(250 x 4.6 mm; 3 $\mu$ m)      | A: Acetone<br>B: H <sub>2</sub> O                                            | —; —; Gradient; —                                       | 4Ts, $\alpha$ T-Ac                                                        | Vegetable extracts, vitamin supplements     | ESI-MS            | [188] |
| Hypersil Fluophase (PFP)<br>(200 x 4.6 mm; 5 $\mu$ m)   | MeOH:H <sub>2</sub> O<br>(95:5)                                              | 23 °C; 0.5 mL/min; Isocratic; 15 min                    | 4Ts                                                                       | Sunflower oil, milk                         | ESI-MS<br>APCI-MS | [189] |
| Ascentiss Express F5 (PFP)<br>(150 x 4.6 mm; 5 $\mu$ m) | MeOH:H <sub>2</sub> O<br>(85:15)                                             | —; 1 mL/min; Isocratic; —                               | 4Ts, 4T3s                                                                 | Fruit and vegetable foods                   | FLD<br>APCI-MS    | [191] |

\*— “ — not provided, 4Ts or 4T3s – in this study all four tocopher-ol/tocotrienol homologues ( $\alpha$ ,  $\beta$ ,  $\gamma$ ,  $\delta$ ) were analytes/separated, ACN – acetonitrile, APCI – atmospheric pressure chemical ionization, DAD – diode array detector, dioxane – 1,4-dioxane, ECD – electrochemical detector, ELSD – evaporative light scattering detector, ESI – elec-trospray ionization, EtOH – Ethanol, FA – formic acid, FLD – fluorescence detector, hx – hexane, IPA - 2-propanol, IS – internal standard, MS – mass spectrometry, MeOH – Methanol, NH<sub>4</sub>OAc – ammonium acetate, TOF – time-of-flight.

**Table S12.** Summary of applied SFC methods for the determination of tocochromanol related compounds

| Column                                       | Mobile phase                    | Temperature, Flow rate, BPR, Gradient or isocratic, Run time | Analytes        | Matrix            | Detector | Ref. |
|----------------------------------------------|---------------------------------|--------------------------------------------------------------|-----------------|-------------------|----------|------|
| Halo Biphenyl<br>(250 x 4.6 mm; 2.7 $\mu$ m) | (A) CO <sub>2</sub><br>(B) MeOH | 25 °C; 2 mL/min; 10 MPa; Gradient; 15 min                    | 4Ts, 4T3s, PC-8 | Cold-pressed oils | DAD      | [12] |

| Column                                            | Mobile phase                                              | Temperature, Flow rate, BPR, Gradient or isocratic, Run time       | Analytes                                                    | Matrix                     | Detector                            | Ref.  |
|---------------------------------------------------|-----------------------------------------------------------|--------------------------------------------------------------------|-------------------------------------------------------------|----------------------------|-------------------------------------|-------|
| Acquity UPC2 BEH<br>(100 x 3.0 mm; 1.7 µm)        | A:CO2<br>B:MeOH<br>(99.5:0.5 v/v)                         | 50 °C; 2.5 mL/min; 12.41 MPa; Isocratic; 5.5 min                   | 4Ts, 4T3s, 11'-α-T1,<br>7,11'-αT2                           | T3 rich fraction           | DAD<br>APCI-MS                      | [52]  |
| Amine Luna NH2<br>(100 x 3.0 mm; 1.7 µm)          | A:CO2<br>B:EtOH (FA 0.1 %)                                | 30 °C; 1.5 mL/min; 13 MPa; Gradient; 5 min                         | α-TAc, 4Ts, 4T3s                                            | Soybean oil                | DAD<br>ESI-MS<br>APCI-MS<br>APPI-MS | [94]  |
| Kinetex C18<br>(100 x 3.0 mm; 1.7 µm)             | A: CO2<br>B: MeOH<br>(99.8:0.2)                           | 40 °C; 4.5 mL/min; 15 MPa; Isocratic; 2 min                        | 4Ts                                                         | Fruit seeds                | DAD                                 | [144] |
| Acquity UPC2 HSS C18 SB<br>(100 x 3.0 mm; 1.7 µm) | A: CO2<br>B: MeOH                                         | 35 °C; 2.3 mL/min; 12.41 MPa; Gradient; 13 min                     | 4 Ts                                                        | Hemp and waste<br>fish oil | PDA                                 | [181] |
| Acquity UPC2 BEH 2-EP<br>(100 x 3.0 mm; 1.7 µm)   | A: CO2<br>B:MeOH:IPA (1:1)<br>Gradient elution            | 50 °C; 1.5 mL/min; 12.41 MPa; Gradient; 6.2 min                    | 4Ts, 4T3s                                                   | Moringa oleifera<br>leaves | DAD                                 | [183] |
| Spherisorb Si<br>(150 x 4.6 mm; 5 µm)             | A:CO2<br>B:MeOH (1 M<br>NH4OAc)<br>(98:2)                 | —; 1.5 mL/min; 15 MPa; Isocratic; 8 min                            | 4Ts, 5,7,8-trimethyl-6-<br>hydroxy-chromanol<br>(IS)        | Vegetable oils             | ECD                                 | [185] |
| Inertsil CN-3<br>(250 x 4.6 mm; 5 µm)             | A:CO2 B:MeOH (99:1)<br>C: (make-up pump):<br>1.0 M NH4OAc | 40 °C; (A+B=3 mL/min;<br>C: 0.5 mL/min); 15 MPa; Isocratic; 30 min | 4Ts, 4T3s, 5,7,8-<br>trimethyl-6-hydroxy-<br>chromanol (IS) | Nutrition<br>supplements   | ECD                                 | [186] |

\* “—” – not provided, 4Ts or 4T3s – in this study all four tocopher-ol/tocotrienol homologues (α, β, γ, δ) were analytes/separated, APCI – atmospheric pressure chemical ionization, APPI – atmospheric pressure photoionization, BPR – back-pressure regulator, DAD – diode array detector, ECD – electrochemical detector, ESI - electrospray ionization, EtOH – Ethanol, IPA - 2-propanol, IS – internal standard, MeOH – Methanol, MS – mass spectrometry, NH4OAc – ammonium acetate
